## Derivation of Transport Equations Using the Time-Dependent Projection Operator Method

Tomoi KOIDE

*Yukawa Institute for Theoretical Physics, Kyoto University, Kyoto 606-8502, Japan*

(Received November 8, 2001)

We develop a formalism to carry out coarse-grainings in quantum field theoretical systems by using a time-dependent projection operator in the Heisenberg picture. A systematic perturbative expansion with respect to the interaction part of the Hamiltonian is given, and a Langevin-type equation without a time-convolution integral term is obtained. This method is applied to a quantum field theoretical model, and coupled transport equations are derived.

### §1. Introduction

Obtaining descriptions of nonequilibrium processes in quantum field theory is an important problem and has been actively studied. In the treatment of such systems, it is often important to carry out reductions or coarse-grainings of irrelevant degrees of freedom. In classical systems, it is widely believed that a system of macroscopic size composed of many microscopic variables exhibits rather simple macroscopic behavior that can be described in terms of only a few macroscopic variables. It is therefore not unreasonable to conjecture that such an elimination of the irrelevant information can be developed for application to quantum systems and help in the analysis of nonequilibrium quantum processes. The projection operator method is one well-known method for carrying out coarse-grainings systematically.<sup>1)-5)</sup> In this method, after the elimination of irrelevant information by means of a projection operator, a kind of master equation in the Schrödinger picture or a Langevin-type equation in the Heisenberg picture is obtained. Famous examples are the Nakajima-Zwanzig and Mori equations.<sup>1),2)</sup> Recently, the unification and generalization of the treatments used in these two pictures has been realized.<sup>4),5)</sup>

In the derivation of kinetic equations from the microscopic point of view, we usually assume that the relevant part of the system interacts with an irrelevant subsystem, which is regarded as a heat reservoir in thermal equilibrium.<sup>6)</sup> However, in a general nonequilibrium system, we can expect the irrelevant subsystem to have some time dependence. Furthermore, it is often convenient to have a description in which two or more coupled systems are considered to be on an equal footing. In particular, in quantum field theory, both relevant and irrelevant parts of the system may be composed of infinite numbers of degrees of freedom, and therefore, it is not clear whether we can regard one subsystem as a reservoir for the other or not. To elucidate this situation, it is convenient to introduce a time-dependent projection operator.

The time-dependent projection operator was first applied by Robertson.<sup>7)</sup> He attempted to project the complex behavior of the relevant density matrix onto a local

equilibrium density matrix and derived a master equation. Ochiai attempted to obtain a kinetic equation by using a similar projection.<sup>8)</sup> Robertson's time-dependent projection operator was improved by Kawasaki et al.<sup>9)</sup> Willis et al. considered coupled systems and introduced another time-dependent projection operator.<sup>10)</sup> A similar projection was implemented by Grabert et al.<sup>11)</sup> Shibata et al. derived a systematic perturbative expansion formula for a master equation without time-convolution integral terms.<sup>12)</sup>

In all of the above cited works, formulations were developed in the Schrödinger picture, and master equations were derived. Langevin-type equations are obtained when we apply the projection operator method in the Heisenberg picture. Such equations were studied by Grabert<sup>13)</sup> and Furukawa.<sup>14)</sup> They carried out an exact transformation of the Heisenberg equation of motion to derive a Langevin-type equation. However, to apply this approach to concrete phenomena, such an exact formulation is not convenient, and we must resort to perturbative calculations. In this paper, we develop a systematic perturbative expansion formula of a Langevin-type equation. It is known that both equations with and without a time-convolution integral term can be derived using the projection operator method.<sup>2)-5)</sup> In this study, we investigate an equation without a time-convolution integral term. Furthermore, to investigate the validity of our formalism, we apply it to a quantum field theoretical model and attempt to derive coupled transport equations.

This paper is organized as follows. In §2, the projection operator method with a time-dependent projection operator is developed. In §3, we apply our formalism to a quantum field theoretical model that is composed of two bosons. We assume local equilibrium and derive coupled transport equations. A summary and conclusions are given in §4.

## §2. Time-dependent projection operator method

Our starting point is the Heisenberg equation of motion,

$$\frac{d}{dt}O(t) = i[H, O(t)] \quad (2.1)$$

$$= iLO(t) \quad (2.2)$$

$$\longrightarrow O(t) = e^{iL(t-t_0)}O(t_0), \quad (2.3)$$

where  $L$  is the Liouville operator and  $t_0$  is the time at which we prepare an initial state. The Heisenberg equation contains complete information of the time-evolution of the operator, but in general, it is difficult to solve exactly when there are interactions. For this reason, it is necessary to carry out a reduction or a coarse-graining of the irrelevant information. For this purpose, we introduce the time-dependent projection operators  $P(t)$  and  $Q(t)$ , which are related as

$$Q(t) = 1 - P(t). \quad (2.4)$$

The projection operator  $P(t)$  helps us to project any operator onto the  $P$ -space, which consists of the relevant degrees of freedom. From Eq. (2.3), one can see that

the time dependence of the operators is determined by  $e^{iL(t-t_0)}$ . This yields

$$\begin{aligned} \frac{d}{dt}e^{iL(t-t_0)} &= e^{iL(t-t_0)}iL \\ &= e^{iL(t-t_0)}(P(t) + Q(t))iL. \end{aligned} \tag{2.5}$$

From this equation, we can derive the two equations

$$\frac{d}{dt}e^{iL(t-t_0)}P(t) = e^{iL(t-t_0)}(P(t) + Q(t))iLP(t) + e^{iL(t-t_0)}\dot{P}(t), \tag{2.6}$$

$$\frac{d}{dt}e^{iL(t-t_0)}Q(t) = e^{iL(t-t_0)}(P(t) + Q(t))iLQ(t) + e^{iL(t-t_0)}\dot{Q}(t), \tag{2.7}$$

where  $\dot{P}(t) = dP(t)/dt$  and  $\dot{Q}(t) = dQ(t)/dt$ . Equation (2.7) can be solved for  $e^{iL(t-t_0)}Q$ :

$$e^{iL(t-t_0)}Q(t) = Q(t_0)e^{i\int_{t_0}^t dsLQ(s)} + \int_{t_0}^t ds e^{iL(s-t_0)}(\dot{Q}(s) + P(s)iLQ(s))e^{i\int_s^t d\tau LQ(\tau)} \tag{2.8}$$

$$\begin{aligned} &= Q(t_0)e^{i\int_{t_0}^t dsLQ(s)} + e^{iL(t-t_0)}(P(t) + Q(t))\Sigma(t, t_0) \\ &= \{Q(t_0)e^{i\int_{t_0}^t dsLQ(s)} + e^{iL(t-t_0)}P(t)\Sigma(t, t_0)\} \frac{1}{1 - \Sigma(t, t_0)}, \end{aligned} \tag{2.9}$$

where

$$\Sigma(t, t_0) = \int_{t_0}^t ds e^{-iL(t-s)}\{\dot{Q}(s) + P(s)iLQ(s)\}e^{i\int_s^t d\tau LQ(\tau)}. \tag{2.10}$$

Here, the time ordered operator  $e^{i\int_{t_0}^t dsLQ(s)}$  is defined as

$$e^{i\int_{t_0}^t dsLQ(s)} = 1 + \sum_{n=1}^{\infty} i^n \int_{t_0}^t dt_1 \int_{t_0}^{t_1} dt_2 \cdots \int_{t_0}^{t_{n-1}} dt_n LQ(t_n)LQ(t_{n-1}) \cdots LQ(t_1). \tag{2.11}$$

Note that there is a term including  $\dot{Q}(s)$  that is not observed in the time-independent projection operator method.<sup>5)</sup>

Substituting Eq. (2.9) into Eq. (2.5) and operating with  $O(t_0)$  from the right, we obtain

$$\begin{aligned} \frac{d}{dt}O(t) &= e^{iL(t-t_0)}P(t)iLO(t_0) \\ &\quad + e^{iL(t-t_0)}P(t)\Sigma(t, t_0)\frac{1}{1 - \Sigma(t, t_0)}iLO(t_0) \\ &\quad + Q(t_0)e^{i\int_{t_0}^t dsLQ(s)}\frac{1}{1 - \Sigma(t, t_0)}iL(t, t_0)O(t_0). \end{aligned} \tag{2.12}$$

This equation has no time-convolution integral. This point is demonstrated at the end of this section. We call this the “time-convolutionless” (TCL) equation. When the time-dependence of the projection operator is ignored, this equation agrees with Eq. (2·13) of Ref. 5). When we substitute Eq. (2·8) into Eq. (2·5), we obtain an equation with a time-convolution integral term, which is called the “time-convolution” (TC) equation.<sup>4),5)</sup> However, we discuss only the TCL equation in this paper.

The TCL equation is exactly equivalent to the Heisenberg equation of motion. Usually, we carry out the perturbative expansion of the interaction Hamiltonian and retain only the lowest order terms, which are often sufficient to describe the dissipation effect. However, the above TCL equation is not convenient to carry out the perturbative expansion. Our next task is therefore to rewrite the TCL equation. For this purpose, we restrict the nature of the projection operator. For the time-independent projection operator  $P$ , the condition  $P^2 = P$  is satisfied. Contrastingly, in the time-dependent case, the order of operation of the projection operators is important. In most previous works, the condition  $P(t_1)P(t_2) = P(t_1)$  was employed.<sup>7)-12), 14)</sup> However, in this paper, we assume the condition

$$P(t_1)P(t_2) = P(t_2), \quad (2\cdot13)$$

because the projection operator that we use in the next section satisfies this condition. From this condition, we can derive several relations:

$$Q(t_1)P(t_2) = 0, \quad (2\cdot14)$$

$$P(t_1)Q(t_2) = P(t_1) - P(t_2), \quad (2\cdot15)$$

$$Q(t_1)Q(t_2) = Q(t_1). \quad (2\cdot16)$$

The total Hamiltonian of the system can be divided into two parts,

$$H = H_0(t, t_0) + H_I(t, t_0), \quad (2\cdot17)$$

where  $H_0(t, t_0)$  and  $H_I(t, t_0)$  are the nonperturbative part and the perturbative part of the Hamiltonian, respectively. In a general nonequilibrium process, we can consider the case in which the mass of a particle changes with time, and therefore,  $H_0(t, t_0)$  becomes time dependent. The corresponding Liouville operators are defined as

$$L_0(t, t_0)O = [H_0(t, t_0), O], \quad L_I(t, t_0)O = [H_I(t, t_0), O]. \quad (2\cdot18)$$

Now, we assume another condition,

$$Q(t_2)L_0(t_1, t_0)P(t_1) = 0. \quad (2\cdot19)$$

With this condition, the form of the nonperturbative Hamiltonian affects that of the projection operator, and vice versa. This condition means that the nonperturbative Hamiltonian does not drive the operator, once it is projected onto the  $P$ -space, into the  $Q$ -space, which is orthogonal to the  $P$ -space.

With the above properties of the projection operators, the function  $\Sigma(t, t_0)$  can be expressed as

$$\begin{aligned} \Sigma(t, t_0) &= \int_{t_0}^t ds e^{-iL(t-s)} \{ \dot{Q}(s) + P(s) i L Q(s) \} e^{i \int_s^t d\tau L Q(\tau)} \\ &= Q(t) - e^{-iL(t-t_0)} Q(t_0) e^{i \int_{t_0}^t d\tau L Q(\tau)} \\ &= Q(t) - U_0^{-1}(t, t_0) \mathcal{C}(t, t_0) Q(t_0) \mathcal{D}(t, t_0) e^{i \int_{t_0}^t ds L_0(s, t_0) Q(s)}. \end{aligned} \tag{2.20}$$

Here, the operators  $\mathcal{C}(t, t_0)$  and  $\mathcal{D}(t, t_0)$  are expressed as

$$\begin{aligned} \mathcal{C}(t, t_0) &= U_0(t, t_0) e^{-iL(t-t_0)} \\ &= 1 + \sum_{n=1}^{\infty} (-i)^n \int_{t_0}^t dt_1 \int_{t_0}^{t_1} dt_2 \cdots \int_{t_0}^{t_{n-1}} dt_n \check{L}_I(t_1, t_0) \check{L}_I(t_2, t_0) \cdots \check{L}_I(t_n, t_0), \end{aligned} \tag{2.21}$$

$$\begin{aligned} \mathcal{D}(t, t_0) &= e^{i \int_{t_0}^t ds L Q(s)} (U_0^Q)^{-1}(t, t_0) \\ &= 1 + \sum_{n=1}^{\infty} i^n \int_{t_0}^t dt_1 \int_{t_0}^{t_1} dt_2 \cdots \int_{t_0}^{t_{n-1}} dt_n \check{L}_I^Q(t_1, t_0) \check{L}_I^Q(t_2, t_0) \cdots \check{L}_I^Q(t_n, t_0), \end{aligned} \tag{2.22}$$

where

$$\check{L}_I(t, t_0) = U_0(t, t_0) L_I U_0^{-1}(t, t_0), \tag{2.23}$$

$$\check{L}_I^Q(t, t_0) = U_0^Q(t, t_0) L_I Q (U_0^Q)^{-1}(t, t_0), \tag{2.24}$$

$$U_0(t, t_0) = e^{i \int_{t_0}^t ds L_0(s, t_0)}, \tag{2.25}$$

$$U_0^Q(t, t_0) = e^{i \int_{t_0}^t ds L_0(s, t_0) Q(s)}. \tag{2.26}$$

It is noteworthy that the term including the time derivative of the projection operator disappears. The operator  $\mathcal{C}(t, t_0)$  [ $\mathcal{D}(t, t_0)$ ] is a time [an anti-time] ordered function of Liouville operators. (The details of these expressions are given in Appendix A.) Then, we have

$$P(t) \Sigma(t, t_0) \frac{1}{1 - \Sigma(t, t_0)} = -P(t) U_0^{-1}(t, t_0) \mathcal{C}(t, t_0) Q(t) \frac{1}{1 + (\mathcal{C}(t, t_0) - 1) Q(t)} U_0(t, t_0). \tag{2.27}$$

To derive this expression, we have used mathematical induction.<sup>5)</sup> (The detailed derivation appears in Appendix B.) Substituting the above result into Eq. (2.12), we obtain

$$\begin{aligned} \frac{d}{dt} O(t) &= e^{iL(t-t_0)} P(t) i L O(t_0) \\ &\quad + e^{iL(t-t_0)} P(t) U_0^{-1}(t, t_0) \mathcal{C}(t, t_0) Q(t) \frac{1}{1 - (\mathcal{C}(t, t_0) - 1) Q(t)} U_0(t, t_0) i L O(t_0) \end{aligned}$$

$$+Q(t_0)e^{i\int_{t_0}^t dsLQ(s)}\frac{1}{1-\Sigma(t,t_0)}iLO(t_0). \quad (2.28)$$

This form of the TCL equation is convenient to carry out the perturbative expansion.

When we expand  $P\Sigma(t,t_0)/(1-\Sigma(t,t_0))$  up to first order in the interaction  $H_I$ , we have

$$\begin{aligned} & \frac{d}{dt}O(t) \\ &= e^{iL(t-t_0)}P(t)iLO(t_0) \\ & \quad - e^{iL(t-t_0)}P(t)U_0^{-1}(t,t_0)Q(t)U_0(t,t_0)iLO(t_0) \\ & \quad + e^{iL(t-t_0)}P(t)U_0^{-1}(t,t_0)\int_{t_0}^t dsU_0(s,t_0)iL_I(s,t_0)U_0^{-1}(s,t_0)Q(t)U_0(t,t_0)iLO(t_0) \\ & \quad - e^{iL(t-t_0)}P(t)U_0^{-1}(t,t_0)Q(t) \\ & \quad \times \int_{t_0}^t dsU_0(s,t_0)iL_I(s,t_0)U_0^{-1}(s,t_0)Q(t)U_0(t,t_0)iLO(t_0) \\ & \quad + Q(t_0)e^{i\int_{t_0}^t dsLQ(s)}\frac{1}{1-\Sigma(t,t_0)}iLO(t_0) \\ &= e^{iL(t-t_0)}P(t)U_0^{-1}(t,t_0)P(t)U_0(t,t_0)iLO(t_0) \\ & \quad + e^{iL(t-t_0)}P(t)U_0^{-1}(t,t_0)P(t)\int_{t_0}^t dsU_0(s,t_0)iL_IU_0^{-1}(s,t_0)Q(t)U_0(t,t_0)iLO(t_0) \\ & \quad + Q(t_0)e^{i\int_{t_0}^t dsLQ(s)}\frac{1}{1-\Sigma(t,t_0)}iLO(t_0). \end{aligned} \quad (2.29)$$

It is easily seen that Eq. (2.29) does not contain a time-convolution integral. If this did contain a time-convolution integral, the form of the full time-evolution operator,  $e^{iL(t-t_0)}$ , which operates from the left in the second term on the r.h.s. of this equation, must be  $e^{iL(t-s)}$ , where  $s$  is an integral variable.<sup>4), 5)</sup> Therefore, this equation is called the TCL equation.

When we ignore the time dependence of the projection operator, Eq. (2.29) is the same as Eq. (2.31) in Ref. 5). It should be noted that not  $Q(t)$  but  $Q(t_0)$  operates from the left in the third term on the r.h.s. of the equation. Hence, this term represents the effect of the initial correlation of the initial density matrix. This point becomes clearer in the next section. In the usual projection operator method, such a term is interpreted as the fluctuation force. Therefore, the third term can be regarded as the fluctuation force also in this time-dependent projection operator method.

### §3. Coupled transport equations

Now, we apply the time-dependent projection operator method to a quantum field theoretical model and derive a transport equation. We consider the Hamiltonian with two boson fields

$$H = H_\sigma + H_\pi + H_I, \quad (3.1)$$

where

$$H_\sigma = \int d^3\mathbf{x} \frac{1}{2} \{ \Phi^2(x) + (\nabla\phi(x))^2 + m_\sigma^2\phi^2(x) \}, \tag{3.2}$$

$$H_\pi = \int d^3\mathbf{x} \frac{1}{2} \{ \Pi^2(x) + (\nabla\pi(x))^2 + m_\pi^2\pi^2(x) \}, \tag{3.3}$$

$$H_I = \int d^3\mathbf{x} g\pi^2(x)\phi(x). \tag{3.4}$$

Here,  $\Phi(x)$  and  $\Pi(x)$  are the conjugate fields of  $\phi(x)$  and  $\pi(x)$ , respectively. We call the particle represented by the  $\phi(x)$  field the  $\sigma$  boson, and that represented by the  $\pi(x)$  field the  $\pi$  boson. The nonperturbative and interaction Hamiltonians are given by  $H_0 = H_\sigma + H_\pi$  and  $H_I$ , respectively. Here, we ignore the time dependence of the nonperturbative Hamiltonian for simplicity.

These four fields are expanded as

$$\phi(\mathbf{x}, t_0) = \sum_{\mathbf{k}} \frac{1}{\sqrt{2V\omega_{\mathbf{k}}^\sigma}} (a_{\mathbf{k}}(t_0)e^{i\mathbf{k}\mathbf{x}} + a_{\mathbf{k}}^\dagger(t_0)e^{-i\mathbf{k}\mathbf{x}}), \tag{3.5}$$

$$\Phi(\mathbf{x}, t_0) = -i \sum_{\mathbf{k}} \sqrt{\frac{\omega_{\mathbf{k}}^\sigma}{2V}} (a_{\mathbf{k}}(t_0)e^{i\mathbf{k}\mathbf{x}} - a_{\mathbf{k}}^\dagger(t_0)e^{-i\mathbf{k}\mathbf{x}}), \tag{3.6}$$

$$\pi(\mathbf{x}, t_0) = \sum_{\mathbf{k}} \frac{1}{\sqrt{2V\omega_{\mathbf{k}}^\pi}} (b_{\mathbf{k}}(t_0)e^{i\mathbf{k}\mathbf{x}} + b_{\mathbf{k}}^\dagger(t_0)e^{-i\mathbf{k}\mathbf{x}}), \tag{3.7}$$

$$\Pi(\mathbf{x}, t_0) = -i \sum_{\mathbf{k}} \sqrt{\frac{\omega_{\mathbf{k}}^\pi}{2V}} (b_{\mathbf{k}}(t_0)e^{i\mathbf{k}\mathbf{x}} - b_{\mathbf{k}}^\dagger(t_0)e^{-i\mathbf{k}\mathbf{x}}), \tag{3.8}$$

where  $\omega_{\mathbf{k}}^\sigma = \sqrt{\mathbf{k}^2 + m_\sigma^2}$  and  $\omega_{\mathbf{k}}^\pi = \sqrt{\mathbf{k}^2 + m_\pi^2}$ . Here,  $V$  and  $t_0$  are the volume of the total system and the initial time at which we prepare the initial state. We take the limit  $V \rightarrow \infty$  at the end of the calculation. The creation and annihilation operators of the  $\sigma$  and  $\pi$  particles are subject to the following commutation relations:

$$[a_{\mathbf{k}}(t_0), a_{\mathbf{k}'}^\dagger(t_0)] = [b_{\mathbf{k}}(t_0), b_{\mathbf{k}'}^\dagger(t_0)] = \delta_{\mathbf{k},\mathbf{k}'}^{(3)}. \tag{3.9}$$

Here,  $[ \ ]$  represents the commutator. All other commutators vanish.

For simplicity, we consider the case in which the initial density matrix is given by the direct product of the  $\sigma$  boson and the  $\pi$  boson density matrices:

$$\rho_0 = \rho_{0\sigma} \otimes \rho_{0\pi}. \tag{3.10}$$

This means that there is no initial correlation between the  $\sigma$  boson and the  $\pi$  boson.

The system we are considering consists of two degrees of freedom, that of the  $\sigma$  boson and that of the  $\pi$  boson. In the usual time-independent projection operator method, it is often assumed that one degree of freedom plays the role of a heat bath in thermal equilibrium for another degree of freedom.<sup>16)</sup> In the present application, we treat the two degrees of freedom on an equal footing and derive coupled transport equations.<sup>10)-12)</sup> First, we calculate the transport equation of the  $\sigma$  boson. In this case, the  $\sigma$  boson is regarded as the system and the  $\pi$  boson as the environment

that is to be coarse-grained, respectively. To integrate out the environment degree of freedom, we define the time-dependent projection operator as

$$P(t)O = \text{Tr}_E[\rho_E(t)O], \tag{3.11}$$

where

$$\rho_E(t) = e^{-\beta(t)H_\pi} / Z_\pi(t), \tag{3.12}$$

$$Z_\pi(t) = \text{Tr}[e^{-\beta(t)H_\pi}]. \tag{3.13}$$

Here,  $\rho_E(t)$  is the local equilibrium density matrix. This projection operator satisfies the conditions (2.13) and (2.19). This choice of  $\rho_E(t)$  comes from our implicit assumption that the time evolution of the  $\pi$  boson is well approximated by the local equilibrium density matrix with the time-dependent temperature  $\beta^{-1}(t)$ . It is possible to calculate the transport equation without assuming local equilibrium in the time evolution of the system. However, in such a case, it is necessary to calculate a large number of correlation functions. To avoid this difficulty, we assume local equilibrium in this paper. Now, we employ the following initial condition:

$$\rho_E(t_0) = \rho_{0\pi}. \tag{3.14}$$

This condition is needed to eliminate the contribution from the third term on the r.h.s. of Eq. (2.29). This becomes clear in the next paragraph. The time dependence of the temperature is determined later.

Substituting  $O(t_0) = a_{\mathbf{k}}^\dagger(t_0)a_{\mathbf{k}}(t_0)$  into Eq. (2.12) and using the definition (3.11), we obtain

$$\begin{aligned} & \frac{d}{dt} a_{\mathbf{k}}^\dagger(t)a_{\mathbf{k}}(t) \\ &= \frac{ig}{\sqrt{2V\omega_{\mathbf{k}}^\sigma}} \langle \rho_{\mathbf{k}}(t, t_0) \rangle_t (a_{\mathbf{k}}(t) - a_{\mathbf{k}}^\dagger(t)) \\ &+ \frac{g^2}{4V\omega_{\mathbf{k}}^\sigma} \int_{t_0}^t ds \{ \langle [\rho_{-\mathbf{k}}(s, t_0), \rho_{\mathbf{k}}(t, t_0)]_+ \rangle_t e^{i\omega_{\mathbf{k}}^\sigma(s-t)} \\ &+ \langle [\rho_{\mathbf{k}}(s, t_0), \rho_{-\mathbf{k}}(t, t_0)]_+ \rangle_t e^{-i\omega_{\mathbf{k}}^\sigma(s-t)} \\ &- 2 \langle \rho_{-\mathbf{k}}(s, t_0) \rangle_t \langle \rho_{\mathbf{k}}(t, t_0) \rangle_t e^{i\omega_{\mathbf{k}}^\sigma(s-t)} - 2 \langle \rho_{-\mathbf{k}}(s, t_0) \rangle_t \langle \rho_{\mathbf{k}}(t, t_0) \rangle_t e^{-i\omega_{\mathbf{k}}^\sigma(s-t)} \} \\ &- \frac{g^2}{4V\omega_{\mathbf{k}}^\sigma} \int_{t_0}^t ds \{ \langle [\rho_{-\mathbf{k}}(s, t_0), \rho_{\mathbf{k}}(t, t_0)] \rangle_t [a_{\mathbf{k}}(t), a_{-\mathbf{k}}(t) e^{-i\omega_{\mathbf{k}}^\sigma(s-t)} + a_{\mathbf{k}}^\dagger(t) e^{i\omega_{\mathbf{k}}^\sigma(s-t)}]_+ \\ &- \langle [\rho_{\mathbf{k}}(s, t_0), \rho_{-\mathbf{k}}(t, t_0)] \rangle_t [a_{\mathbf{k}}^\dagger(t), a_{\mathbf{k}}(t) e^{-i\omega_{\mathbf{k}}^\sigma(s-t)} + a_{-\mathbf{k}}^\dagger(t) e^{i\omega_{\mathbf{k}}^\sigma(s-t)}]_+ \} \\ &+ flu, \end{aligned} \tag{3.15}$$

where

$$\langle \rho_{\mathbf{k}}(t, t_0) \rangle_t = \int d^3\mathbf{x} e^{i\mathbf{k}\mathbf{x}} \text{Tr}[\rho_E(t)\pi^2(\mathbf{x}, t; t_0)], \tag{3.16}$$

$$\begin{aligned} & \langle [\rho_{\mathbf{k}_1}(s, t_0), \rho_{\mathbf{k}_2}(t, t_0)] \rangle_t \\ &= \int d^3\mathbf{x}_1 d^3\mathbf{x}_2 e^{i\mathbf{k}_1\mathbf{x}_1} e^{i\mathbf{k}_2\mathbf{x}_2} \text{Tr}[\rho_E(t)[\pi^2(\mathbf{x}_1, s; t_0), \pi^2(\mathbf{x}_2, t; t_0)]]. \end{aligned} \tag{3.17}$$



$$\langle [\rho_{\mathbf{k}_1}(s, t_0), \rho_{\mathbf{k}_2}(t, t_0)]_+ \rangle_t = \int d^3\mathbf{x}_1 d^3\mathbf{x}_2 e^{i\mathbf{k}_1\mathbf{x}_1} e^{i\mathbf{k}_2\mathbf{x}_2} \text{Tr}[\rho_E(t)[\pi^2(\mathbf{x}_1, s; t_0), \pi^2(\mathbf{x}_2, t; t_0)]_+]. \quad (3.18)$$

Here,  $[\ ]_+$  is the anti-commutator. The last term,  $flu$ , on the r.h.s. of Eq. (3.15) comes from the third term on the r.h.s. of Eq. (2.29). When we calculate the expectation value by using the initial density matrix, this term vanishes because of the definition of  $flu$  and the condition (3.14). When we consider the initial density matrix with an initial correlation, we cannot employ the condition (3.10), and the third term has a finite value. In short, the third term represents the effect of the initial correlation. We can thus regard the third term  $flu$  as the fluctuation force term as in the usual projection operator method. In this calculation, we do not consider the initial correlation, and therefore, we ignore this term.

Before continuing with the calculation, we discuss the structure of this equation. This equation has strange terms that are proportional to  $a_{\mathbf{k}}^\dagger(t)$ ,  $a_{\mathbf{k}}(t)$ ,  $a_{\mathbf{k}}^\dagger(t)a_{-\mathbf{k}}^\dagger(t)$  and  $a_{\mathbf{k}}(t)a_{-\mathbf{k}}(t)$ . Such terms are not seen in the usual Boltzmann equation, which is constituted of terms proportional to  $a_{\mathbf{k}}^\dagger(t)a_{\mathbf{k}}(t)$ . The terms proportional to  $a_{\mathbf{k}}^\dagger(t)$  and  $a_{\mathbf{k}}(t)$  survive when we consider the case that there is a condensate of the  $\sigma$  boson. Here, we do not consider the case of the condensate, and therefore we ignore such terms. The existence of the terms proportional to  $a_{\mathbf{k}}^\dagger(t)a_{-\mathbf{k}}^\dagger(t)$  and  $a_{\mathbf{k}}(t)a_{-\mathbf{k}}(t)$  was pointed out in Ref. 15). In that paper it is noted that the existence of such terms is homologous to a parametric amplifier, and  $a_{\mathbf{k}}^\dagger(t)a_{-\mathbf{k}}^\dagger(t)$ ,  $a_{\mathbf{k}}(t)a_{-\mathbf{k}}(t)$  and  $a_{\mathbf{k}}^\dagger(t)a_{\mathbf{k}}(t)$  form the  $SU(1,1)$  symmetry group. In this calculation, we drop such terms for simplicity.

To calculate the correlation functions (3.16), (3.17) and (3.18), it is convenient to use a technique of thermo-field dynamics (TFD). (The detailed calculation is given in Appendix C.) Simply quoting the result, we obtain

$$\text{Tr}[\rho_E(t)\rho_{\mathbf{k}}(t, t_0)] = \int d^3\mathbf{x} e^{i\mathbf{k}\mathbf{x}} \underbrace{\pi(\mathbf{x}, t)}_{B(t)} \pi(\mathbf{x}, t), \quad (3.19)$$

$$\begin{aligned} \text{Tr}[\rho_E(t)[\rho_{\mathbf{k}_1}(s, t_0), \rho_{\mathbf{k}_2}(t, t_0)]] &= \int d^3\mathbf{x}_1 d^3\mathbf{x}_2 e^{i\mathbf{k}_1\mathbf{x}_1} e^{i\mathbf{k}_2\mathbf{x}_2} \\ &\times 2\{(\underbrace{\pi(\mathbf{x}_1, s)}_{B(t)} \underbrace{\pi(\mathbf{x}_2, t)}_{B(t)})^2 - (\underbrace{\pi(\mathbf{x}_2, t)}_{B(t)} \underbrace{\pi(\mathbf{x}_1, s)}_{B(t)})^2\}, \end{aligned} \quad (3.20)$$

where

$$\underbrace{\pi(\mathbf{x}_1, t_1)}_{B(t)} \underbrace{\pi(\mathbf{x}_2, t_2)}_{B(t)} = \sum_{\mathbf{k}} \frac{1}{2V\omega_{\mathbf{k}}^\pi} ((1 + n_{\mathbf{k}}^\pi(t)) e^{-i\omega_{\mathbf{k}}^\pi(t_1-t_2)} + n_{\mathbf{k}}^\pi(t) e^{i\omega_{\mathbf{k}}^\pi(t_1-t_2)}) e^{i\mathbf{k}(\mathbf{x}_1-\mathbf{x}_2)}. \quad (3.21)$$

Substituting the above results into Eq. (3.15) and taking the expectation value with respect to the initial density matrix, we obtain the transport equation of the  $\sigma$  distribution function,

$$\frac{d}{dt} n_{\mathbf{k}}^\sigma = \frac{g^2}{2(2\pi)^3 \omega_{\mathbf{k}}^\sigma} \int_{t_0}^t ds \int d^3\mathbf{q} \frac{1}{\omega_{\mathbf{q}}^\pi \omega_{\mathbf{q}+\mathbf{k}}^\pi}$$

$$\begin{aligned}
 & \times [\{(1 + n_q^\pi)(1 + n_{q+k}^\pi)(1 + n_k^\sigma) - n_q^\pi n_{q+k}^\pi n_k^\sigma\} \cos(\omega_q^\pi + \omega_{q+k}^\pi + \omega_k^\sigma)(s - t) \\
 & + \{n_q^\pi n_{q+k}^\pi (1 + n_k^\sigma) - (1 + n_q^\pi)(1 + n_{q+k}^\pi) n_k^\sigma\} \cos(\omega_q^\pi + \omega_{q+k}^\pi - \omega_k^\sigma)(s - t) \\
 & + \{(1 + n_q^\pi) n_{q+k}^\pi (1 + n_k^\sigma) - n_q^\pi (1 + n_{q+k}^\pi) n_k^\sigma\} \cos(\omega_q^\pi - \omega_{q+k}^\pi + \omega_k^\sigma)(s - t) \\
 & + \{n_q^\pi (1 + n_{q+k}^\pi)(1 + n_k^\sigma) - (1 + n_q^\pi) n_{q+k}^\pi n_k^\sigma\} \cos(\omega_q^\pi - \omega_{q+k}^\pi - \omega_k^\sigma)(s - t)],
 \end{aligned}
 \tag{3.22}$$

where  $n_k^\sigma(t) = \text{Tr}[\rho a_k^\dagger(t_0) a_k(t_0)]$ . Here we have omitted the time dependence of  $n_k^\sigma$  and  $n_k^\pi$  for simplicity. Each term in the braces on the r.h.s. of this equation is composed of two contributions: the gain term and the loss term. The first term describes the creation of two  $\pi$  bosons and one  $\sigma$  boson minus their annihilation. The second term describes the creation of one  $\sigma$  boson and the annihilation of two  $\pi$  bosons minus the annihilation of one  $\sigma$  boson and the creation of two  $\pi$  bosons. The third and fourth terms describe the creation of one  $\sigma$  boson and one  $\pi$  boson and the annihilation of one  $\pi$  boson minus the annihilation of one  $\sigma$  boson and one  $\pi$  boson and the creation of one  $\pi$  boson. This is a reasonable result, which is expected from the usual Boltzmann equation.<sup>17), 18)</sup> When we take the limit  $t_0 \rightarrow -\infty$ , Dirac delta functions that preserve energy conservation are obtained.

To solve the above transport equation, it is necessary to determine the time dependence of the  $\pi$  distribution function. Our next task is to obtain the transport equation for the  $\pi$  boson. Our strategy is to treat the  $\sigma$  and  $\pi$  degrees of freedom on an equal footing. We thus reverse the roles of the  $\sigma$  and  $\pi$  degrees of freedom; that is, we regard the  $\pi$  boson as the system and the  $\sigma$  boson as the environment and calculate the transport equation of the  $\pi$  boson using the same procedure as in the calculation of Eq. (3.22). In this way, we obtain the coupled transport equations of the  $\sigma$  and  $\pi$  distribution functions.

The projection operator is given by

$$P(t)O = \text{Tr}_E[\rho_E(t)O], \tag{3.23}$$

where

$$\rho_E(t) = e^{-\beta(t)H_\sigma} / Z_\phi(t), \tag{3.24}$$

$$Z_\phi(t) = \text{Tr}[e^{-\beta(t)H_\sigma}]. \tag{3.25}$$

As in the case of the  $\sigma$  boson, the  $\sigma$  distribution function is included in the  $\pi$  transport equation. We assume local equilibrium in the time evolution again, i.e.,

$$\text{Tr}[\rho_E(t) a_k^\dagger(t_0) a_k(t_0)] = n_k^\sigma(t), \tag{3.26}$$

where  $n_k^\sigma(t)$  is given by the solution of Eq. (3.22).

When we use the definition (3.24) and substitute  $O(t_0) = b^\dagger(t_0)b(t_0)$  into Eq. (2.12), we can obtain the transport equation of the  $\pi$  distribution function. In this case, the transport equation has fourth order correlation functions of the  $\pi$  boson. To obtain a closed form for the coupled transport equations, we approximate such terms as

$$\begin{aligned}
 \text{Tr}[\rho_0 b_k^\dagger(t) b_l^\dagger(t) b_m(t) b_n(t)] &= n_k^\pi(t) n_l^\pi(t) \delta_{k,m}^{(3)} \delta_{l,n}^{(3)} + n_k^\pi(t) n_l^\pi(t) \delta_{k,n}^{(3)} \delta_{l,m}^{(3)}.
 \end{aligned}
 \tag{3.27}$$

Finally, the transport equation for the  $\pi$  distribution function is

$$\begin{aligned} \frac{d}{dt}n_{\mathbf{k}}^{\pi} &= \int_{t_0}^t ds \int d^3l \frac{g^2}{(2\pi)^3 \omega_{\mathbf{k}}^{\pi} \omega_l^{\pi} \omega_{l+\mathbf{k}}^{\sigma}} \\ &\times [\{ (1 + n_{\mathbf{k}+l}^{\sigma})(1 + n_{\mathbf{k}}^{\pi})(1 + n_l^{\pi}) - n_{\mathbf{k}+l}^{\sigma} n_{\mathbf{k}}^{\pi} n_l^{\pi} \} \cos(\omega_{l+\mathbf{k}}^{\sigma} + \omega_l^{\pi} + \omega_{\mathbf{k}}^{\pi})(s - t) \\ &+ \{ n_{\mathbf{k}+l}^{\sigma}(1 + n_{\mathbf{k}}^{\pi})(1 + n_l^{\pi}) - (1 + n_{\mathbf{k}+l}^{\sigma}) n_{\mathbf{k}}^{\pi} n_l^{\pi} \} \cos(\omega_{l+\mathbf{k}}^{\sigma} - \omega_l^{\pi} - \omega_{\mathbf{k}}^{\pi})(s - t) \\ &+ \{ (1 + n_{\mathbf{k}+l}^{\sigma})(1 + n_{\mathbf{k}}^{\pi}) n_l^{\pi} - n_{\mathbf{k}+l}^{\sigma}(1 + n_l^{\pi}) n_{\mathbf{k}}^{\pi} \} \cos(\omega_{l+\mathbf{k}}^{\sigma} - \omega_l^{\pi} + \omega_{\mathbf{k}}^{\pi})(s - t) \\ &+ \{ n_{\mathbf{k}+l}^{\sigma}(1 + n_{\mathbf{k}}^{\pi}) n_l^{\pi} - (1 + n_{\mathbf{k}+l}^{\sigma})(1 + n_l^{\pi}) n_{\mathbf{k}}^{\pi} \} \cos(\omega_{l+\mathbf{k}}^{\sigma} + \omega_l^{\pi} - \omega_{\mathbf{k}}^{\pi})(s - t)]. \end{aligned} \tag{3-28}$$

Each term in the braces on the r.h.s. of Eq. (3-28) can be interpreted as gain minus loss processes, as in the case of the  $\sigma$  transport equation. The time-evolution of the  $\sigma$  and  $\pi$  distribution functions are obtained by solving this coupled set of equations.

#### §4. Summary and conclusions

We have derived a systematic perturbative expansion formula for a Langevin-type equation without time-convolution integral terms. In this formalism, the irrelevant subsystem can have some time dependence, and therefore, we can treat a more general nonequilibrium process in which the mass, the temperature, and so on, are time dependent. When we ignore the time dependence of the projection operator, we can reproduce the result of the usual projection operator method.<sup>5)</sup> Furthermore, the third term on the r.h.s. of Eq. (2-29) represents the effect of the initial correlation. We can thus interpret it as the fluctuation force even in the time-dependent projection operator method.

We applied this formalism to a quantum field theoretical model that consists of  $\sigma$  and  $\pi$  bosons and thereby obtained coupled transport equations for the two bosons. Deriving these coupled transport equations, the correlation functions were calculated with respect to the local equilibrium density matrix. In other words, we have assumed that the time evolution of the system can be well approximated by the local equilibrium distribution function. The derived equations have terms that are not seen in the usual Boltzmann equation. It is worth studying the effect of such terms on the transport equation, but we have dropped them in this paper. Each transport equation has a form that can be interpreted as gain minus loss processes, which is the structure usually seen in the Boltzmann equation. This gives reason to believe that the time-dependent projection operator method developed in this paper is a valid formalism to describe nonequilibrium processes.

In this paper, we have ignored the time dependence of the nonperturbative Hamiltonian. In general nonequilibrium processes, it is possible to consider the situation in which the mass of a particle changes with time. In this case, the time dependence of the nonperturbative Hamiltonian is caused by the time-dependent mass. We will report on an investigation of this effect in a future publication.

Finally, we mention the fluctuation-dissipation theorem. This is a famous theorem in statistical mechanics that expresses the relation between macroscopic trans-

port coefficients and microscopic fluctuations. It is well-known that there are two expressions for the fluctuation-dissipation theorem. For the Langevin equation, the fluctuation-dissipation theorem of the second kind is important. This theorem was first proven by Mori using a time-independent projection operator technique.<sup>2)</sup> Furukawa developed the time-dependent Mori projection operator, according to which the generalized version of the fluctuation-dissipation theorem of the second kind was obtained.<sup>14)</sup> The time-dependent Mori projection operator, which satisfies  $P(t)P(t') = P(t)$ , is not included in our formalism, due to condition (2.13). Our formalism includes the time-independent projection operator method and reproduces the Tokuyama-Mori equation<sup>3)</sup> when we use the Mori projection operator. Therefore, the fluctuation force in our formalism agrees with that in the Tokuyama-Mori formalism. We thus conclude that our fluctuation force is a natural extension of theirs, which satisfies the fluctuation-dissipation theorem. However, the fluctuation-dissipation theorem in our formalism has still not been established, and demonstrating it is one important future problem.

### Acknowledgements

The author thanks F. Shibata and Y. Yamanaka for useful discussions.

### Appendix A

#### — Definition of the Operators $\mathcal{C}$ and $\mathcal{D}$ —

The definitions of the operators  $\mathcal{C}(t, t_0)$  and  $\mathcal{D}(t, t_0)$  are

$$\mathcal{C}(t, t_0) = U_0(t, t_0)e^{-iL(t-t_0)}, \tag{A.1}$$

$$\mathcal{D}(t, t_0) = e^{\int_{t_0}^t ds LQ(s)} (U_0^Q)^{-1}(t, t_0), \tag{A.2}$$

where

$$U_0(t, t_0) = e^{\int_{t_0}^t ds L_0(s, t_0)}, \tag{A.3}$$

$$U_0^Q(t, t_0) = e^{\int_{t_0}^t ds L_0(s, t_0)Q(s)}. \tag{A.4}$$

These operators must satisfy the following differential equations:

$$\begin{aligned} \frac{d}{dt}\mathcal{C}(t, t_0) &= U_0(t, t_0)(iL_0(t, t_0) - iL)e^{-iL(t-t_0)} \\ &= -i\check{L}_I(t, t_0)\mathcal{C}(t, t_0), \end{aligned} \tag{A.5}$$

$$\begin{aligned} \frac{d}{dt}\mathcal{D}(t, t_0) &= e^{\int_{t_0}^t ds LQ(s)} (iL - iL_0(t, t_0))Q(t)(U_0^Q)^{-1}(t, t_0) \\ &= \mathcal{D}(t, t_0)i\check{L}_I^Q(t, t_0), \end{aligned} \tag{A.6}$$

where

$$\check{L}_I(t, t_0) = U_0(t, t_0)L_I(t, t_0)U_0^{-1}(t, t_0), \tag{A.7}$$

$$\check{L}_I^Q(t, t_0) = U_0^Q(t, t_0)L_I(t, t_0)Q(U_0^Q)^{-1}(t, t_0). \tag{A.8}$$

The solutions of the above differential equations are

$$\mathcal{C}(t, t_0) = 1 + \sum_{n=1}^{\infty} (-i)^n \int_{t_0}^t dt_1 \int_{t_0}^{t_1} dt_2 \cdots \int_{t_0}^{t_{n-1}} dt_n \check{L}_I(t_1, t_0) \check{L}_I(t_2, t_0) \cdots \check{L}_I(t_n, t_0), \tag{A.9}$$

$$\mathcal{D}(t, t_0) = 1 + \sum_{n=1}^{\infty} i^n \int_{t_0}^t dt_1 \int_{t_0}^{t_1} dt_2 \cdots \int_{t_0}^{t_{n-1}} dt_n \check{L}_I^Q(t_1, t_0) \check{L}_I^Q(t_2, t_0) \cdots \check{L}_I^Q(t_n, t_0). \tag{A.10}$$

### Appendix B

#### — Transformation of the Operator $\Sigma(t, t_0)$ —

The operator  $\Sigma(t, t_0)$  can be rewritten as

$$\begin{aligned} \Sigma(t, t_0) &= \int_{t_0}^t ds e^{-iL(t-s)} \{ \dot{Q}(s) + P(s) i L Q(s) \} e^{i \int_s^t d\tau L Q(\tau)} \\ &= \int_{t_0}^t ds e^{-iL(t-s)} \frac{d}{ds} (Q(s) e^{i \int_s^t d\tau L Q(\tau)}) - \int_{t_0}^t ds e^{-iL(t-s)} \frac{d}{ds} e^{i \int_s^t d\tau L Q(\tau)} \\ &= -P(t) + e^{-iL(t-t_0)} P(t_0) e^{i \int_{t_0}^t d\tau L Q(\tau)} + \int_{t_0}^t ds e^{-iL(t-s)} i L P(s) e^{i \int_s^t d\tau L Q(\tau)} \\ &= -P(t) + e^{-iL(t-t_0)} P(t_0) e^{i \int_{t_0}^t d\tau L Q(\tau)} + \int_{t_0}^t ds \frac{d}{ds} e^{-iL(t-s)} e^{i \int_s^t d\tau L Q(\tau)} \\ &= Q(t) - e^{-iL(t-t_0)} Q(t_0) e^{i \int_{t_0}^t d\tau L Q(\tau)} \\ &= Q(t) - U_0^{-1}(t, t_0) \mathcal{C}(t, t_0) Q(t_0) \mathcal{D}(t, t_0) e^{i \int_{t_0}^t ds L_0(s, t_0) Q(s)}. \end{aligned} \tag{B.1}$$

Using mathematical induction, we confirm the following relation:

$$\begin{aligned} &P(t) \Sigma(t, t_0) (Q(t) \Sigma(t, t_0))^n \\ &= [(-1)^{n-1} P(t) \{ \tilde{Q}(t) (\tilde{\mathcal{C}}(t) - 1) \}^n \tilde{Q}(t) + (-1)^{n-1} P(t) \{ (\tilde{\mathcal{C}}(t) - 1) \tilde{Q}(t) \}^{n+1}] \\ &\quad + P(t) \sum_{l=0}^{n-1} (-1)^l \{ \tilde{Q}(t) (\tilde{\mathcal{C}}(t) - 1) \}^l \tilde{Q}(t) (\tilde{\mathcal{D}}(t) - 1) (\tilde{Q}(t) \Sigma(t, t_0))^{n-1-l} \\ &\quad + P(t) \sum_{l=0}^{n-1} (-1)^l \{ (\tilde{\mathcal{C}}(t) - 1) \tilde{Q}(t) \}^{l+1} (\tilde{\mathcal{D}}(t) - 1) (\tilde{Q}(t) \Sigma(t, t_0))^{n-1-l} \\ &\quad - P(t) \sum_{l=0}^n (-1)^l \{ \tilde{Q}(t) (\tilde{\mathcal{C}}(t) - 1) \}^l \tilde{Q}(t) (\tilde{\mathcal{D}}(t) - 1) (\tilde{Q}(t) \Sigma(t, t_0))^{n-l} \\ &\quad - P(t) \sum_{l=0}^n (-1)^l \{ (\tilde{\mathcal{C}}(t) - 1) \tilde{Q}(t) \}^{l+1} (\tilde{\mathcal{D}}(t) - 1) (\tilde{Q}(t) \Sigma(t, t_0))^{n-l}, \end{aligned} \tag{B.2}$$

where

$$\tilde{Q}(t) = U_0^{-1}(t, t_0) Q(t_0) U_0^Q(t, t_0), \tag{B.3}$$

$$\tilde{\mathcal{C}}(t) = U_0^{-1}(t, t_0)\mathcal{C}(t, t_0)U_0(t, t_0), \tag{B-4}$$

$$\tilde{\mathcal{D}}(t) = (U_0^Q)^{-1}(t, t_0)\mathcal{D}(t, t_0)U_0^Q(t, t_0). \tag{B-5}$$

Here,  $n$  is an integer and  $n \geq 1$ . In this derivation, we have used the relation

$$Q(t)\tilde{Q}(t) = Q(t), \tag{B-6}$$

which can be proved from the condition (2-19). The second and third terms in  $P(t)\Sigma(t, t_0)(Q(t)\Sigma(t, t_0))^n$  and the fourth and fifth terms in  $P(t)\Sigma(t, t_0) \times (Q(t)\Sigma(t, t_0))^{n-1}$  cancel. The fourth and fifth terms in  $P(t)\Sigma(t, t_0)(Q(t)\Sigma(t, t_0))^n$  and the second and third terms in  $P(t)\Sigma(t, t_0)(Q(t)\Sigma(t, t_0))^{n+1}$  also cancel. Therefore, only the first term survives. As a result, all the terms including  $\tilde{\mathcal{D}}(t)$  disappear.

Note that the relation  $\Sigma(t, t_0) = \Sigma(t, t_0)Q(t)$  can be derived from Eq. (2-16). We thus find

$$\begin{aligned} & P(t)\Sigma(t, t_0)\frac{1}{1 - \Sigma(t, t_0)} \\ &= P(t)\Sigma(t, t_0)\frac{1}{1 - Q(t)\Sigma(t, t_0)} \\ &= P(t)\Sigma(t, t_0)\sum_{n=0}^{\infty}(Q(t)\Sigma(t, t_0))^n \\ &= -P(t)\sum_{n=0}^{\infty}[\{-\tilde{Q}(t)(\tilde{\mathcal{C}}(t) - 1)\}^n\tilde{Q}(t) - \{-(\tilde{\mathcal{C}}(t, t_0) - 1)\tilde{Q}(t)\}^{n+1}] \\ &= -P(t)U_0^{-1}(t, t_0)\sum_{n=0}^{\infty}[\{-Q(t)(\mathcal{C}(t, t_0) - 1)\}^nQ(t) \\ &\quad - \{-(\mathcal{C}(t, t_0) - 1)Q(t)\}^{n+1}]U_0(t, t_0) \\ &= -P(t)U_0^{-1}(t, t_0)Q(t)\frac{1}{1 + (\mathcal{C}(t, t_0) - 1)Q(t)}U_0(t, t_0) \\ &\quad - P(t)U_0^{-1}(t, t_0)(\mathcal{C}(t, t_0) - 1)Q(t)\frac{1}{1 + (\mathcal{C}(t, t_0) - 1)Q(t)}U_0(t, t_0) \\ &= -P(t)U_0^{-1}(t, t_0)\mathcal{C}(t, t_0)Q(t)\frac{1}{1 + (\mathcal{C}(t, t_0) - 1)Q(t)}U_0(t, t_0). \end{aligned} \tag{B-7}$$

### Appendix C

— Calculation of Correlation Functions Based on Nonequilibrium TFD —

To calculate the correlation functions (3-16), (3-17) and (3-18), it is convenient to use a technique of thermo-field dynamics (TFD). In TFD, the statistical average is expressed as a kind of a vacuum expectation value. As an example, we consider the statistical average of the system with the free Hamiltonian of a boson system,  $H = \sum \omega_{\mathbf{k}}d_{\mathbf{k}}^\dagger d_{\mathbf{k}}$ . First, we introduce the transformation through which the new pairs of creation and annihilation operators  $D_{\mathbf{k}}$  and  $D_{\mathbf{k}}^\dagger$ , and  $\tilde{D}_{\mathbf{k}}$  and  $\tilde{D}_{\mathbf{k}}^\dagger$  are defined:

$$d_{\mathbf{k}}^\dagger = \cosh\theta_{\mathbf{k}}D_{\mathbf{k}}^\dagger + \sinh\theta_{\mathbf{k}}\tilde{D}_{\mathbf{k}}, \tag{C-1}$$

$$d_{\mathbf{k}} = \cosh\theta_{\mathbf{k}}D_{\mathbf{k}} + \sinh\theta_{\mathbf{k}}\tilde{D}_{\mathbf{k}}^{\dagger}, \tag{C.2}$$

where

$$\sinh^2\theta_{\mathbf{k}} = n_{\mathbf{k}}, \quad \cosh^2\theta_{\mathbf{k}} = 1 + n_{\mathbf{k}}. \tag{C.3}$$

Here,  $n_{\mathbf{k}}$  is a Bose distribution function. The above operators satisfy the commutation relation

$$[D_{\mathbf{k}}, D_{\mathbf{k}'}^{\dagger}] = [\tilde{D}_{\mathbf{k}}, \tilde{D}_{\mathbf{k}'}^{\dagger}] = \delta_{\mathbf{k},\mathbf{k}'}^{(3)}. \tag{C.4}$$

All other commutators vanish. Now, we can define the thermal vacuum  $|\theta_D\rangle$  as

$$D_{\mathbf{k}}|\theta_D\rangle = \tilde{D}_{\mathbf{k}}|\theta_D\rangle = 0. \tag{C.5}$$

We thus express the statistical average in terms of the vacuum expectation value:

$$\text{Tr}[\rho_{th}O] = \langle\theta_D|O|\theta_D\rangle, \tag{C.6}$$

where

$$\rho_{th} = e^{-\beta H}/Z, \tag{C.7}$$

$$Z = \text{Tr} e^{-\beta H}. \tag{C.8}$$

Next, we return to the calculation of the correlation functions with the local equilibrium density matrix. In the case of a time-dependent temperature, we introduce a time-dependent transformation to define the new pairs of creation and annihilation operators  $B_{\mathbf{k}}(t)$  and  $B_{\mathbf{k}}^{\dagger}(t)$ , and  $\tilde{B}_{\mathbf{k}}(t)$  and  $\tilde{B}_{\mathbf{k}}^{\dagger}(t)$ :

$$b_{\mathbf{k}}^{\dagger}(t_0) = \cosh\theta_{\mathbf{k}}^{\pi}(t)B_{\mathbf{k}}^{\dagger}(t) + \sinh\theta_{\mathbf{k}}^{\pi}(t)\tilde{B}_{\mathbf{k}}(t), \tag{C.9}$$

$$b_{\mathbf{k}}(t_0) = \cosh\theta_{\mathbf{k}}^{\pi}(t)B_{\mathbf{k}}(t) + \sinh\theta_{\mathbf{k}}^{\pi}(t)\tilde{B}_{\mathbf{k}}^{\dagger}(t), \tag{C.10}$$

where

$$\sinh^2\theta_{\mathbf{k}}^{\pi}(t) = n_{\mathbf{k}}^{\pi}(t), \tag{C.11}$$

$$\cosh^2\theta_{\mathbf{k}}^{\pi}(t) = 1 + n_{\mathbf{k}}^{\pi}(t). \tag{C.12}$$

Here,  $n_{\mathbf{k}}^{\pi}(t)$  is the time-dependent distribution function of the  $\pi$  boson:

$$\begin{aligned} n_{\mathbf{k}}^{\pi}(t) &= \text{Tr}[\rho_E(t)b_{\mathbf{k}}^{\dagger}(t_0)b_{\mathbf{k}}(t_0)] \\ &= \frac{1}{e^{\beta(t)\omega_{\mathbf{k}}^{\pi}} - 1}. \end{aligned} \tag{C.13}$$

The creation and annihilation operators  $B_{\mathbf{k}}(t)$ ,  $B_{\mathbf{k}}^{\dagger}(t)$ ,  $\tilde{B}_{\mathbf{k}}(t)$  and  $\tilde{B}_{\mathbf{k}}^{\dagger}(t)$  satisfy

$$[B_{\mathbf{k}}(t), B_{\mathbf{k}'}^{\dagger}(t)] = [\tilde{B}_{\mathbf{k}}(t), \tilde{B}_{\mathbf{k}'}^{\dagger}(t)] = \delta_{\mathbf{k},\mathbf{k}'}^{(3)}. \tag{C.14}$$

All other commutators vanish. Then, we can define the time-dependent vacuum  $|\theta_B(t)\rangle$  as

$$B_{\mathbf{k}}(t)|\theta_B(t)\rangle = \tilde{B}_{\mathbf{k}}(t)|\theta_B(t)\rangle = 0. \tag{C.15}$$

We thus express the statistical average with the local equilibrium density matrix in terms of the time-dependent vacuum expectation value:

$$\text{Tr}[\rho_E(t)O] = \langle \theta_B(t) | O | \theta_B(t) \rangle, \quad (\text{C}\cdot 16)$$

where  $\rho_E(t)$  is defined in Eq. (3\cdot 12). Therefore, we can simplify the calculation of the correlation functions with the help of Wick's theorem.<sup>19)</sup> Simply quoting the result, we obtain

$$\begin{aligned} \text{Tr}[\rho_E(t)\rho_{\mathbf{k}}(t, t_0)] &= \langle \theta_B(t) | \rho_{\mathbf{k}}(t, t_0) | \theta_B(t) \rangle \\ &= \int d^3\mathbf{x} e^{i\mathbf{k}\mathbf{x}} \underbrace{\pi(\mathbf{x}, t)}_{B(t)} \pi(\mathbf{x}, t), \end{aligned} \quad (\text{C}\cdot 17)$$

$$\begin{aligned} \text{Tr}[\rho_E(t)[\rho_{\mathbf{k}_1}(s, t_0), \rho_{\mathbf{k}_2}(t, t_0)]] &= \langle \theta_B(t) | [\rho_{\mathbf{k}_1}(s, t_0), \rho_{\mathbf{k}_2}(t, t_0)] | \theta_B(t) \rangle \\ &= \int d^3\mathbf{x}_1 d^3\mathbf{x}_2 e^{i\mathbf{k}_1\mathbf{x}_1} e^{i\mathbf{k}_2\mathbf{x}_2} \\ &\quad \times 2\{ \underbrace{(\pi(\mathbf{x}_1, s) \pi(\mathbf{x}_2, t))}_{B(t)}^2 - \underbrace{(\pi(\mathbf{x}_2, t) \pi(\mathbf{x}_1, s))}_{B(t)}^2 \}, \end{aligned} \quad (\text{C}\cdot 18)$$

where

$$\begin{aligned} &\underbrace{\pi(\mathbf{x}_1, t_1) \pi(\mathbf{x}_2, t_2)}_{B(t)} \\ &= \sum_{\mathbf{k}_1, \mathbf{k}_2} \frac{1}{2V \sqrt{\omega_{\mathbf{k}_1}^\pi \omega_{\mathbf{k}_2}^\pi}} [\cosh_{\mathbf{k}_1}^\pi(t) B_{\mathbf{k}_1}(t) e^{-i\omega_{\mathbf{k}_1}^\pi(t_1-t_0)} \\ &\quad + \sinh_{-\mathbf{k}_1}^\pi(t) \tilde{B}_{-\mathbf{k}_1}(t) e^{i\omega_{\mathbf{k}_1}^\pi(t_1-t_0)}, \sinh_{-\mathbf{k}_2}^\pi(t) \tilde{B}_{-\mathbf{k}_2}^\dagger(t) e^{-i\omega_{\mathbf{k}_2}^\pi(t_2-t_0)} \\ &\quad + \cosh_{\mathbf{k}_2}^\pi(t) B_{\mathbf{k}_2}^\dagger(t) e^{i\omega_{\mathbf{k}_2}^\pi(t_2-t_0)}] \\ &= \sum_{\mathbf{k}} \frac{1}{2V \omega_{\mathbf{k}}^\pi} (\cosh^2 \theta_{\mathbf{k}}^\pi(t) e^{-i\omega_{\mathbf{k}}^\pi(t_1-t_2)} + \sinh^2 \theta_{\mathbf{k}}^\pi(t) e^{i\omega_{\mathbf{k}}^\pi(t_1-t_2)}) e^{i\mathbf{k}(\mathbf{x}_1-\mathbf{x}_2)}. \end{aligned} \quad (\text{C}\cdot 19)$$

Readers familiar with nonequilibrium thermo-field dynamics may notice the difference between the technique that we have outlined here and that used in Ref. 17). However, these two techniques give the same result with respect to the trace calculation.<sup>20)</sup>

## References

- 1) S. Nakajima, Prog. Theor. Phys. **20** (1958), 948.  
R. Zwanzig, J. Chem. Phys. **33** (1960), 1338.
- 2) H. Mori, Prog. Theor. Phys. **33** (1965), 423.
- 3) M. Tokuyama and H. Mori, Prog. Theor. Phys. **55** (1976), 411.
- 4) N. Hashitsume, F. Shibata and M. Shingū, J. Stati. Phys. **17** (1977), 155.  
F. Shibata and N. Hashitsume, J. Phys. Soc. Jpn. **44** (1978), 1435.  
F. Shibata and T. Arimitsu, J. Phys. Soc. Jpn. **49** (1980), 891.  
C. Uchiyama and F. Shibata, Phys. Rev. E **60** (1999), 2636.
- 5) T. Koide and M. Maruyama, Prog. Theor. Phys. **104** (2000), 575.
- 6) A. Schmid, J. Low Temp. Phys. **49** (1982), 609.  
M. Morikawa, Phys. Rev. D **33** (1986), 3607.  
D. Lee and D. Boyanovsky, Nucl. Phys. B **406** (1993), 631.



- M. Gleiser and R. O. Ramos, Phys. Rev. D **50** (1994), 2441.  
A. Berera, M. Gleiser and R. O. Ramos, Phys. Rev. D **58** (1998), 123508.  
C. Greiner and B. Müller, Phys. Rev. D **55** (1997), 1026.  
D. H. Rischke, Phys. Rev. D **58** (1998), 2331.  
Z. Xu and C. Greiner, Phys. Rev. D **62** (2000), 036012.  
T. Koide, M. Maruyama and F. Takagi, hep-ph/0102272.  
7) B. Robertson, Phys. Rev. **144** (1966), 151; J. Math. Phys. **11** (1970), 2482.  
8) M. Ochiai, Phys. Lett. A **44** (1973), 145.  
9) K. Kawasaki and J. D. Gunton, Phys. Lett. A **40** (1972), 35; Phys. Rev. A **8** (1973), 2048.  
10) C. R. Willis and R. H. Picard, Phys. Rev. A **9** (1974), 1343; *ibid.* **16** (1977), 1625.  
11) H. Grabert and W. Weidlich, Z. Phys. **268** (1974), 139.  
12) F. Shibata and N. Hashitsume, Z. Phys. B **34** (1979), 197.  
13) H. Grabert, Z. Phys. B **27** (1977), 95.  
14) H. Furukawa, Prog. Theor. Phys. **62** (1979), 70.  
15) F. Shibata, Y. Hamano and N. Hashitsume, J. Phys. Soc. Jpn. **50** (1981), 2166.  
16) T. Koide, M. Maruyama and F. Takagi, Prog. Theor. Phys. **101** (1999), 373.  
17) Y. Yamanaka, H. Umezawa, K. Nakamura and T. Arimitsu, Int. J. Mod. Phys. A **9** (1994), 1153.  
18) L. P. Kadanoff and G. Baym, *Quantum Statistical Mechanics, Green's Functions Methods in Equilibrium and Nonequilibrium Problems* (Addison-Wesley, New York, 1989).  
19) F. Gross, *Relativistic Quantum Mechanics and Field Theory* (Wiley, New York, 1993).  
20) Y. Yamanaka, private communications.
